# Supplementary material for: Autofluorescence multiphoton microscopy for visualization of tissue morphology and cellular dynamics in murine and human airways
Source: PubMed Central journal article supplement — Lab Invest. 2016 Jul 11;96(8):918–31. doi: 10.1038/labinvest.2016.69 (PMC4972900; doi:10.1038/labinvest.2016.69), 2016-07-11

| Structure     | Multi-photon excitation and emission maxima in literature                                                | Multi-photon excitation and emission in our experiments | Channel and false colour                                                                                               |
|---------------|----------------------------------------------------------------------------------------------------------|---------------------------------------------------------|------------------------------------------------------------------------------------------------------------------------|
| Elastin       | Ex: 350 nm, 410 nm, 450 nm (11)<br>Em: 420 nm, 500 nm, 520 nm (11)<br>Ex: 750 nm (15)<br>Em: 425 nm (15) | Ex: 750 nm<br>Em: 440-580 nm                            | Channel 1:<br>400-440 nm<br>blue<br>Channel 2:<br>440-495 nm<br>green                                                  |
| Collagen      | Ex: 700-740 nm (SHG, 8)<br>Em: 380-400 nm (SHG, 8)<br>Ex: 820 nm (SHG, 15)<br>Em: 380 nm (SHG, 15)       | Ex: 750 nm, 820 nm<br>Em: 400-440 nm                    | Channel 1:<br>400-440 nm<br>blue                                                                                       |
| NADH          | Ex: 290 nm, 340 nm (11)<br>Em: 440 nm, 450 nm (11)<br>Ex: 750 nm (15)<br>Em: 470 nm (15)                 | Ex: 750 nm<br>Em: 400-580 nm                            | Channel 2:<br>440-495 nm<br>green<br>Less in<br>Channel 1:<br>400-440 nm<br>blue<br>Channel 3:<br>495-580 nm<br>yellow |
| Lipopigments  | Ex: 750 nm (15)<br>Em: 550 nm (15)                                                                       | Ex: 750 nm<br>Em: 440-580 nm                            | Channel 4:<br>580-680 nm<br>red                                                                                        |
| Flavine (FAD) | Ex: 450 nm (11)<br>Em: 515 nm (11)<br>Ex: 750 nm (15)<br>Em: 560 nm (15)                                 | Ex: 750 nm<br>Em: 440-580 nm                            | Channel 4:<br>580-680 nm<br>red                                                                                        |

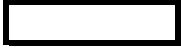

Supplement: labinvest201669x17.pdf [file labinvest201669x17.pdf]
